# Supplementary material for: The association between perceived household educational support and HIV risk in young women in a rural South African community (HPTN 068): A cross sectional study
Source: PubMed Central journal article supplement (PMC6336295; doi:10.1371/journal.pone.0210632), 2019-01-17
Supplement: pone.0210632.s002.pdf [file pone.0210632.s002.pdf]

Participant ID

ptid [ ] [ ] [ ] [ ] - [ ] [ ] [ ] [ ] - [ ] [ ] - [ ] [ ]

Site Number Participant Number Chk Cohort

Demographics: Young Woman

DEMstid [ ] [ ] [ ] [ ]

Unit/Site ID

Form Completion Date

DEMdt [ ] [ ] [ ] [ ] [ ] [ ] [ ] [ ]

dd MMM yy

1. What is the participant's (young woman) date of birth? ... DEMbthdt [ ] [ ] [ ] [ ] [ ] [ ] [ ] [ ] If unknown, record age: DEMage [ ] [ ] years

male female

2. What is your gender? NOT APPLICABLE FOR THIS PROTOCOL. DEMsex [ ] [ ]

3. Mark the appropriate racial category for this participant.

DEBlack Black

DEClrd Coloured

DEWhite White

DEIndn Indian

DEraco other, specify: DEMracox \_\_\_\_\_

Participant ID

ptid  -  -  -   
 Site Number Participant Number Chk Cohort

Demographics: Parent/Guardian

Form Completion Date

DEPdt        
 dd MMM yy

1. What is the Parent/Guardian's Participant ID? .....

DEPppid  -  -  -   
 Site Number Participant Number Chk Cohort

2. What is the Parent/Guardian's date of birth? .....

DEPbthdt       → **If unknown, record age:**     
 dd MMM yy years

male female

3. What is the Parent/Guardian's gender?.....

DEPsex

4. Mark the appropriate racial category for the Parent/Guardian.

DEPblack Black

DEPclr Coloured

DEPwhite White

DEPindn Indian

DEPraco other, specify:

5. Did the Parent/Guardian complete the Baseline Household Questionnaire? .....

yes no  
 DEPghq

Participant ID

Enrollment Date

ptid - - Enrollment
Site Number Participant Number Chk Cohort

ENRdt - -
dd MMM yy

1. Did the participant complete the ACASI Baseline Questionnaire? ..... yes no ENRacasi

2. Mark the village (village number) where the participant has her permanent residence:

- ENRagincourt (101) ENRjusticia A/Justicia B (109) ENRxxanthia (117)
ENRclboquet Lawn B (102) ENRkildare A (110) ENRkhyaya Lami (118)
ENRclcroquetlawn (103) ENRkildare B/Kildare C (111) ENRdmpamphries A (119)
ENRcunnaingmore A (104) ENRlilldale A/Rholane (112) ENRdmpamphries B (120)
ENRcunnaingmore B (105) ENRlilldale B (113) ENRdmpamphries C (121)
ENRhuntington (106) ENRnewbington B (114) ENRireceagh C (122)
ENRireagh A (107) ENRnewbington C (115) ENRsmstcomerset C (123)
ENRireagh B (108) ENRsmstcomerset A/Somerset B (116) ENRblfblfast (124)
ENRmerrytypebble Stream (125) ENRcoork (126) ENRthulthulamahashe (127)
ENRrllle C (125)
ENRkhumani (125)

3. What is the grade of the participant at enrollment? ..... 8th grade 9th grade 10th grade 11th grade ENRgrade

4. Was informed consent for long-term specimen storage signed? ..... yes no ENRspec

5. Record the Randomization Envelope Number: ..... ENRren

6. Indicate the participant's randomization assignment: ..... intervention (conditional cash transfer) control (no payments) ENRra

Participant ID

ptid [ ] [ ] [ ] [ ] [ ] [ ] - [ ] [ ] [ ] [ ] - [ ] [ ] - [ ] [ ]
Site Number Participant Number Chk Cohort

Follow-up Visit

Visit Date

FUVdt [ ] [ ] [ ] [ ] [ ] [ ] [ ] [ ]
dd MMM yy

1. Did the participant complete the ACASI Follow-up Questionnaire? .....

yes no
FUVacasi [ ] [ ]

2. Since the last visit, has the participant experienced any social harms as a result of participation in this study?

yes no
FUVsh [ ] [ ]

If yes, complete Social Impact Log.

3. Since the last visit, did the participant change her village of permanent residence? .....

yes no
FUVvilch [ ] [ ]

If no, go to item 4.

3a. Record new Village Number: .....

FUVviln [ ] [ ] [ ] [ ] [ ] [ ]

If 125, specify village:

- FUVvills [ ] Merrypebble Stream
[ ] Rolle C
[ ] Khumani

4. Since the last visit, has there been a change in the participant's Parent/Guardian of record? .....

yes no
FUVpgch [ ] [ ]

If no, go to item 5.

4a. Was a Demographics: Parent/Guardian CRF submitted for this parent/guardian at a previous visit?

yes no
FUVpgdep [ ] [ ]

If no, complete Demographics: Parent/Guardian. Go to item 5.

4b. Record Parent/Guardian ID: .....

FUVpgpid [ ] [ ] [ ] [ ] [ ] [ ] - [ ] [ ] [ ] [ ] - [ ] [ ] - [ ] [ ]
Site Number Participant Number Chk Cohort

5. Did the Parent/Guardian complete the Follow-up Household Questionnaire? .....

yes no
FUVpghq [ ] [ ]

Participant ID

ptid [ ] [ ] [ ] [ ] - [ ] [ ] [ ] [ ] - [ ] - [ ]
Site Number Participant Number Chk Cohort

Virology Test Results

Initial Specimen Collection Date

VTRdt [ ] [ ] [ ] [ ] [ ] [ ]
dd MMM yy

1. Specimen Collection for Storage

stored not stored reason not stored:
1a. Plasma [ ] VTRpls [ ] VTRpls
1b. Dried blood spot [ ] VTRdbs [ ] VTRdbpr

[ ] VTRhlv Mark this box if participant was previously confirmed HIV+. End of form.

Alternate Collection Date

Not done/ Not collected dd MMM yy
VTRhsv VTRhsvdt [ ] [ ] [ ] [ ]

2. HSV-1 TEST. SEE HSV-1 FORM. [ ] VTRhsv [ ]

3. HIV Test Results

Not done/ Not collected Alternate Collection Date dd MMM yy
VTRrap VTRrapdt [ ] [ ] [ ] [ ]
VTR2rap VTR2rapdt [ ] [ ] [ ] [ ]

kit code negative positive
3a. Rapid test 1 [ ] VTR1rt [ ] VTRrap [ ]
3b. Rapid test 2 [ ] VTR2rt [ ] VTR2rap [ ]

If one or both are positive, complete HIV Confirmatory Test Results.

VTRcomm

Comments: \_\_\_\_\_

Plate Number: 135 HSV-1: HSV-2 Test Result

Visit Code visit

HPTN 068 (183)

HSV-1 (135)

Participant ID

ptid  -  -  -

Site Number Participant Number Chk Cohort

HSV-2 Test Result

Specimen Collection Date

HSVdt

dd MMM yy

negative positive not done

1. HSV-2 Result  HSVhsv   → *If not done, specify reason in Comments.*

Comments: HSVcomm

---



---

Participant ID

ptid Site Number Participant Number Chk Cohort

HIV Confirmatory Test Results

Sample 1 1. Absolute CD4+ HTRcd4 cells/mm3 2. HIV Western Blot HTRwb1

3. Sample 2 HTR2nd Specimen Collection Date HTR2c1dt 3a. HIV Western Blot HTRwb2 3b. Plasma Storage HTR2pls Reason: HTR2pls Reason: HTR2dbsx 3c. Dried Blood Spot Storage HTR2dbsx

4. Sample 3 HTR3nd Specimen Collection Date HTR3c1dt 4a. HIV Western Blot HTRwb3 4b. Plasma Storage HTR3pls Reason: HTR3pls 4c. Dried Blood Spot Storage HTR3dbsx

5. Final HIV status: HTRfin negative positive other, specify: HTRfinx

Comments: HTRcomm

bit4bit5bit6bit7 145 145 JAN-11

HPTN 068 (183)

SIL-1 (151)

Participant ID

ptid  -  -  -

Site Number Participant Number Chk Cohort

Social Impact Log

1. Concisely describe social impact related to study participation experienced by the participant:

**SILsumx**

---



---



---



---

2. Onset date: .....

*dd MMM yy*

3. Reported at visit: .....

*SILatvis*

4. Social impact code:

*SILcode*

5. Social impact grade:

|                          |                              |                            |                                                      |
|--------------------------|------------------------------|----------------------------|------------------------------------------------------|
| <i>Grade 1:<br/>mild</i> | <i>Grade 2:<br/>moderate</i> | <i>Grade 3:<br/>severe</i> | <i>Grade 4:<br/>potentially<br/>life-threatening</i> |
| <input type="text"/>     | <input type="text"/>         | <input type="text"/>       | <input type="text"/>                                 |

**SILgrade**

|                                                       |                            |                                            |
|-------------------------------------------------------|----------------------------|--------------------------------------------|
| <b>Social Impact Codes:</b> See back for definitions. |                            |                                            |
| <b>01</b> Personal Relationships                      | <b>05</b> Medical/Dental   | <b>09</b> Military/Other Government Agency |
| <b>02</b> Travel/Immigration                          | <b>06</b> Health Insurance | <b>10</b> Other                            |
| <b>03</b> Employment                                  | <b>07</b> Life Insurance   | <b>11</b> Harassment, bullying, coercion   |
| <b>04</b> Education                                   | <b>08</b> Housing          | <b>12</b> Violence                         |
|                                                       |                            | <b>13</b> Sexual                           |



Plate Number: 155 FCD-1: Follow-up CD4 Test Result

Visit Code .

HPTN 068 (183)

FCD-1 (155)

Participant ID

ptid ---  
Site Number Participant Number Chk Cohort

Follow-up CD4 Test Result

Specimen Collection Date

FCDdt     
*dd MMM yy*

1. Absolute CD4+

*cells/mm3*  
FCDcd4

*not done*

FCDcd4

*If not done, specify reason in Comments.*

Comments:

FCDcomm

---

---

bit 4155b1520155 155 FEB-12

formlang  
Language

sfdt\_155  
Staff Initials / Date

Participant ID

-  -  -  -   
 Site Number Participant Number Chk Cohort

Graduation Visit

Visit/Form Completion Date

-  -  -   
 dd MMM yy

**GVlav** → *Mark this box if visit was completed and was a Limited Assessment. Complete LAV-1, ESI-1, and TM-1 (mark reason 2a). End of form.*

1. Did the participant complete this visit?

**GVcplt** → *If yes, complete VTR-1, ESI-1, and TM-1 (mark reason 2a). Complete HSV-1 and/or FCD-1, if applicable. End of form.*

no → *If no, complete TM-1 and ESI-1.*

1a. If no, indicate reason. **Mark only one.**

**GVrsn** participant refused

participant lost to follow-up

previous visit was too recent

participant deceased

other, specify: **GVrsnotx** \_\_\_\_\_

Comments: GVcomm

Participant ID

ptid [ ]-[ ]-[ ]-[ ] Site Number Participant Number Chk Cohort

Visit/Form Completion Date

PIVdt [ ]-[ ]-[ ]-[ ] dd MMM yy

Post-intervention Visit

1. Was the post-intervention visit completed?

PIVcomp1 [ ] no

If yes, go to item 2.

1a. If no, why wasn't the visit completed? Mark only one. End of form.

- PIVrsn [ ] unable to contact participant
[ ] participant refused visit
[ ] participant incarcerated
[ ] participant deceased
[ ] investigator decision, specify: PIVrsnid
[ ] other, specify: PIVrsnox

2. Was a limited assessment visit conducted at this post-intervention visit?

PIVlav [ ] no

If yes, complete the Post-Intervention Limited Assessment Visit form.

3. Did the participant complete the ACASI Young Woman Questionnaire?

PIVacas1 [ ]

4. Did the participant complete the Household Questionnaire?

PIVhhq [ ]

5. Since the last visit, has the participant experienced any social harms as a result of participation in this study?

PIVsh [ ]

If yes, complete Social Impact Log.

6. Since the last visit, did the participant change her village of permanent residence?

PIVvilch [ ]

If no, go to item 7.

6a. Record new Village Number:

PIVwilln [ ]-[ ]-[ ]

If 125, specify village:

- PIVvills [ ] Meripbble Stream
[ ] Rolle C
[ ] Khumani

7. Blood Pressure:

7a. Blood Pressure-1st measurement:

PIVbp1s [ ]/[ ] PIVbp1d [ ] mmHg OR PIVbp1n [ ] Not done

7b. Blood Pressure-2nd measurement:

PIVbp2s [ ]/[ ] PIVbp2d [ ] mmHg OR PIVbp2n [ ] Not done

7c. Blood Pressure-3rd measurement:

PIVbp3s [ ]/[ ] PIVbp3d [ ] mmHg OR PIVbp3n [ ] Not done

8. Height: ..... PIVht [ ] . [ ] cm

OR PIVhtn [ ] Not done

9. Weight: ..... PIVwt [ ] . [ ] kg

OR PIVwt n [ ]

10. Waist Circumference: ..... PIVwst [ ] . [ ] cm

OR PIVwst n [ ]

11. BMI: ..... PIVbmi [ ] . [ ] kg/m^2

OR PIVbmin [ ]

12. Was informed consent for long-term specimen storage signed? .....

PIVspec [ ] yes [ ] no

Comments: PIVcomm



Participant ID

ptid [ ]-[ ]-[ ]-[ ]
Site Number Participant Number Chk Cohort

Initial Specimen Collection Date

PLVdt [ ]-[ ]-[ ]-[ ]
dd MMM yy

Post-intervention Limited Assessment Visit

1. Were HIV rapid tests performed by finger stick? PLVrap [ ] [ ] If no, do not complete form. Do not fax to SCHARP DataFax.

1a. Dried blood spot storage PLVdbs [ ] [ ] Reason not stored: PLVdbsr

1b. HIV Test Results

1b1. Rapid test 1 PLVkit1 [ ] [ ] PLVrap1 [ ] [ ]

1b2. Rapid test 2 PLVkit2 [ ] [ ] PLVrap2 [ ] [ ]

Alternate Collection Date

PLVhivdt [ ]-[ ]-[ ]-[ ]
dd MMM yy

2. Was a venous blood draw done? PLVvbd [ ] [ ] If no, end of form.

2a. HIV Western Blot PLVwb [ ] [ ] [ ] If negative or indeterminate, contact Network Lab.

2b. Plasma storage PLVpls [ ] [ ] Reason not stored: PLVpls

Comments: PLVcomm

**Participant ID**

ptid [ ] [ ] [ ] [ ] [ ] [ ] [ ] [ ] [ ] [ ]  
 Site Number Participant Number Chk Cohort

**Interim Visit**

**Visit Date**

IVdt [ ] [ ] [ ] [ ] [ ] [ ] [ ] [ ]  
 dd MMM yy

1. What is the reason for this interim visit? *Mark all that apply.*

**IVpgch** change in Parent/Guardian

1a1. Was a Demographics: Parent/Guardian CRF submitted for this parent/guardian at a previous visit? .....

yes no  
 **IVpgdep**

**Complete Demographics: Parent/Guardian. Go to item 1b.**

1a2. Record Parent/Guardian ID: .....

**IVppgid** [ ] [ ] [ ] [ ] [ ] [ ] [ ] [ ]  
 Site Number Participant Number Chk Cohort

**IVvillch** change in participant's village of permanent residence

1b1. Record new Village Number: .....

**IVnvill** [ ] [ ] [ ] [ ]  
 If 125, specify village:  
 Menyepbe Stream  
 Rolle C  Khumani

**IVshc**. to report social harm(s) → **Complete Social Impact Log.**

**IVhiv**. HIV testing → **Complete Virology Test Results.**

**IVcd4**. follow-up CD4 testing → **Complete Follow-up CD4 Test Results.**

**IVhsv**. HSV testing → **Complete HSV-2 Results.**

**IVothx**. other, specify: \_\_\_\_\_

Participant ID

ptid  -  -  -   
Site Number Participant Number Chk Cohort

Missed Visit

Form Completion Date

MVfcdt      
dd MMM yy

1. Target Visit Date:      
dd MMM yy

2. Reason visit was missed. *Mark only one.*

- 2a. unable to contact participant
- 2b. unable to schedule appointment(s) within target window
- 2c. participant refused visit
- 2d. participant incarcerated
- 2e. participant admitted to a health care facility
- 2f. participant withdrew from the study —> **Complete a Termination form.**
- 2g. participant deceased —> **Complete a Termination form.**
- 2h. other, specify:

MVotrex

Comments: MVcomm  
\_\_\_\_\_  
\_\_\_\_\_  
\_\_\_\_\_

HPTN 068 (183)

PIL-1 (487)

Participant ID

-     -  -   
 Site Number Participant Number Chk Cohort

Participant Incident Log —  
For Internal Use Only

Form Completion Date:          
dd MMM yy

Study Project Manager:

If applicable: Plate #:

Visit/Page #:

Incident: Mark all that apply

- inappropriate enrollment/ineligible
- randomization
- HIV testing
- protocol deviation/event
- other, specify:
- [protocol-specific reason]

Details: Provide additional information, including date(s), site(s), lab(s), outcome, etc. as appropriate.

---

---

---

---

---

---

---

---

---

---

FOR INTERNAL USE ONLY



**Participant ID**

-     -  -

Site Number Participant Number Chk Cohort

**End of Study Inventory**

**Form Completion Date**

dd MMM yy

1. What is the **highest** visit code (scheduled or interim) for this participant, recorded on a form submitted via DataFax?.....

*visit code*

2. How many interim visits were conducted for this participant during the study and recorded on a form submitted via DataFax? .....

*# of interim visits*

3. Indicate the **highest** page number submitted for this participant for the Social Impact Log:

3a. Social Impact Log (SIL-1) .....  *page #* OR  *no pages submitted*

Comments: ESIcomm

Participant ID

|             |                    |  |  |  |     |        |  |
|-------------|--------------------|--|--|--|-----|--------|--|
| ptid        |                    |  |  |  |     |        |  |
| Site Number | Participant Number |  |  |  | Chk | Cohort |  |

Termination

1. Termination Date:     *Date the site determined that the participant was no longer in the study.*

2. Reason for termination. *Mark only one.*

2a. ~~reason~~ scheduled exit visit/end of study **End of form.**

2b. death, *indicate date and cause if known*

2b1. date of death     OR   date unknown

2b2. cause of death  OR   cause unknown

2c. participant refused further participation, specify:

2d. participant unable to adhere to visit schedule

2e. participant relocated, no follow-up planned

2f. investigator decision, specify:

2g. unable to contact participant

2h. **NOT APPLICABLE FOR THIS PROTOCOL.**

2i. inappropriate enrollment

2j. invalid ID due to duplicate screening/enrollment

2k. other, specify:

2l. early study closure

Comments:
